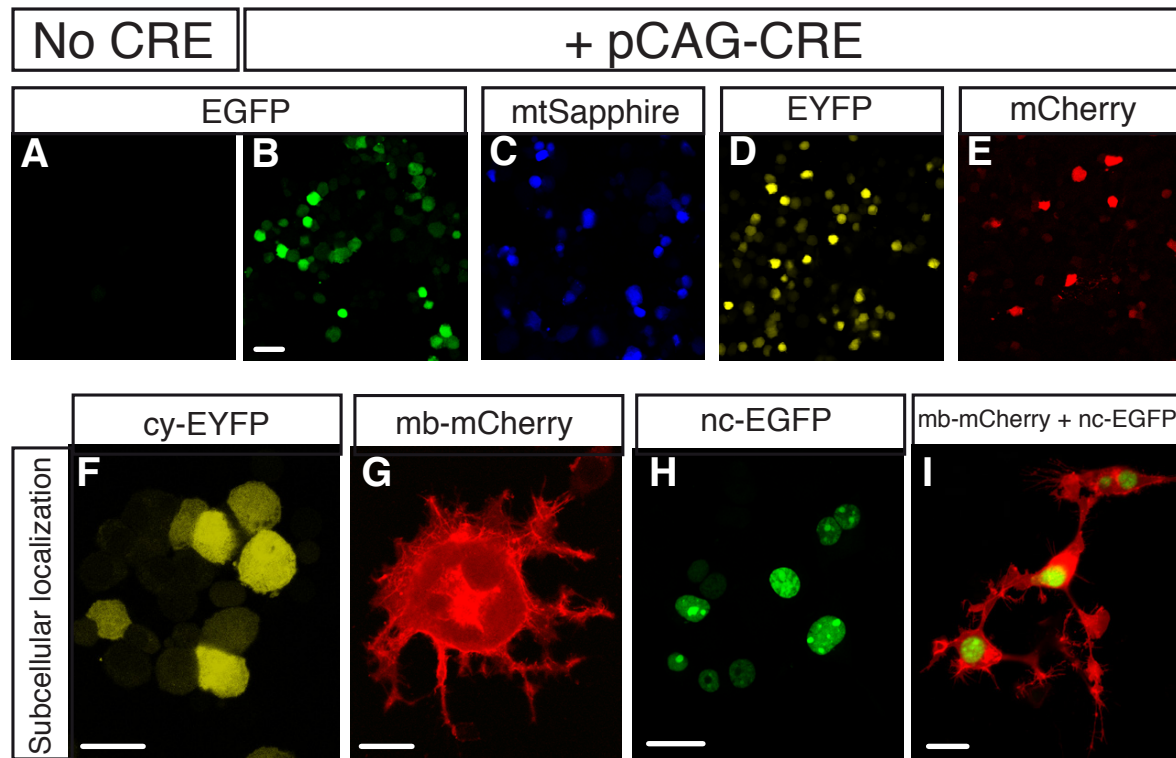

**Figure S1. In vitro validation of arrested labelling vectors and the subcellular localization of the fluoroproteins.** All newly generated plasmid vectors were validated in vitro. (A) Cultured N2A cells were transfected by FuGENE transfection reagent, but no fluorescence was detected in any of these transfections, showing that the SV40 stop signal efficiently arrested the expression of fluorescent proteins. (B-E) N2A cells transfected along with pCAG-CRE became then fluorescent with each of the different cytoplasmic fluorophores. (F-I) Subcellular localization of arrested tagged fluoroproteins in cultured N2A cells after cotransfection with pCAG-CRE. (F) cytoplasmic EYFP labels the cytoplasm of the cells. (G) mb-mCherry tags the red fluorophore to the cellular membrane. (H) nc-EGFP labels the nuclei in transfected cells. (I) Both membrane-tagged mCherry and nuclear-tagged EGFP fluorophores are complementary in the same cell. Scale bars 50  $\mu$ m (bar in B applies to B-E).

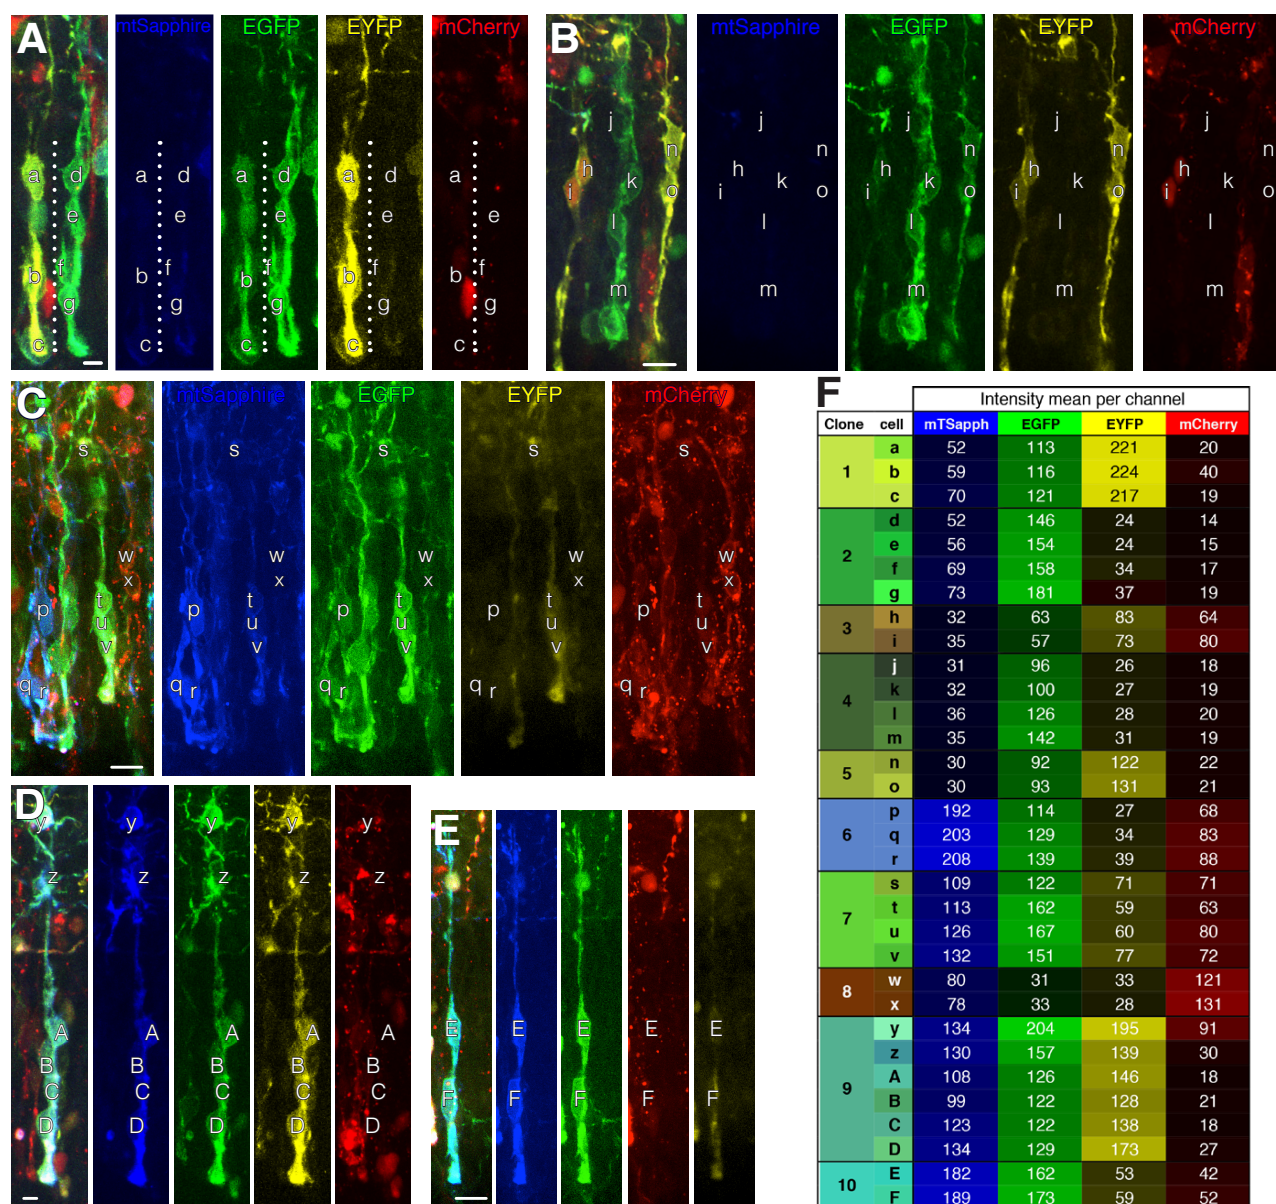

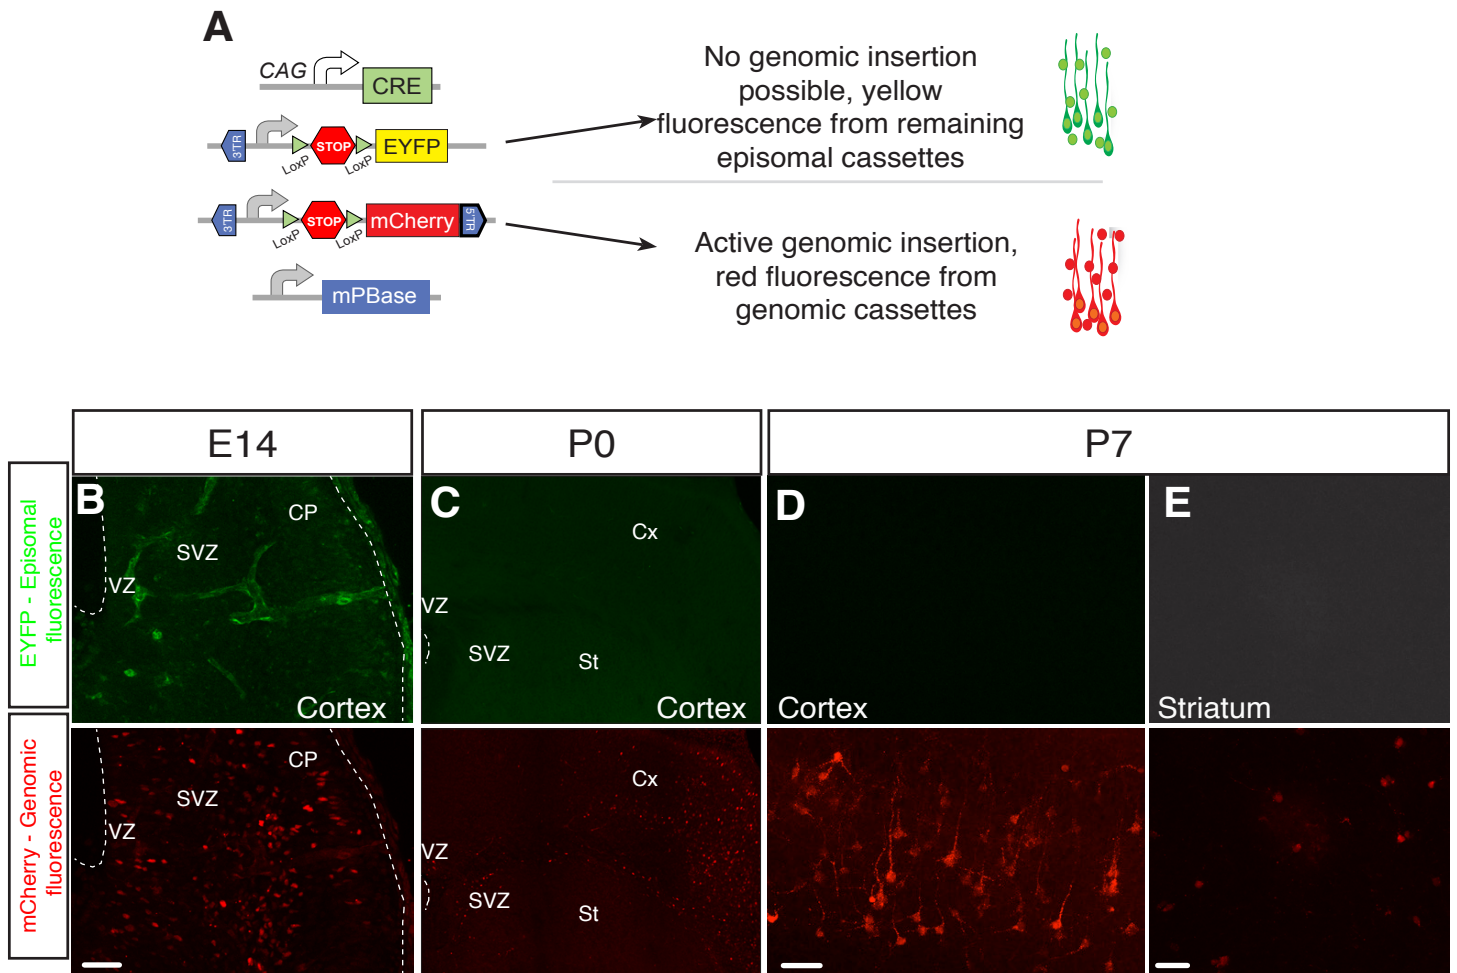

**Figure S3. Transposition is necessary to detect fluorescence, episomal fluorescence is neither detected in short or nor long-term experiments.** (A) Two different labelling vectors were cotransfected on E12 mouse forebrains, along with pCAG-CRE and mPB and at usual *CLoNe* low DNA concentrations: a pPB-CAG-STOP-mCherry vector and a truncated form of the EYFP labelling vector without the 3' *piggybac* terminal repetitions. Accordingly, only the mCherry expressing vector can be transposed to the genome of the progenitors, whereas the EYFP vector copies remain episomally. (A-B) Examples of detected fluorescence at E14 (A, only two days after electroporation; n=4) and P0 (B; n=2) at the developing neocortex. Only autofluorescence from blood vessels was detected in the yellow channel. As expected by the genomic transposition, fluorescent mCherry-expressing cells can be detected in differentiating postmitotic neurons in the cortical plate (CP) and postnatal cortex (Cx) and in mitotic cells of the germinative ventricular and subventricular zones (VZ and SVZ). (D-E) Examples of detected fluorescence at P7 at the neocortex and striatum (n=2). In all cases only red fluorescence was found, suggesting that episomally-originated fluorescence is diluted and silenced as brief as 2 days after electroporation. St: striatum. Scale Bars (B,D-E) 50  $\mu$ m.



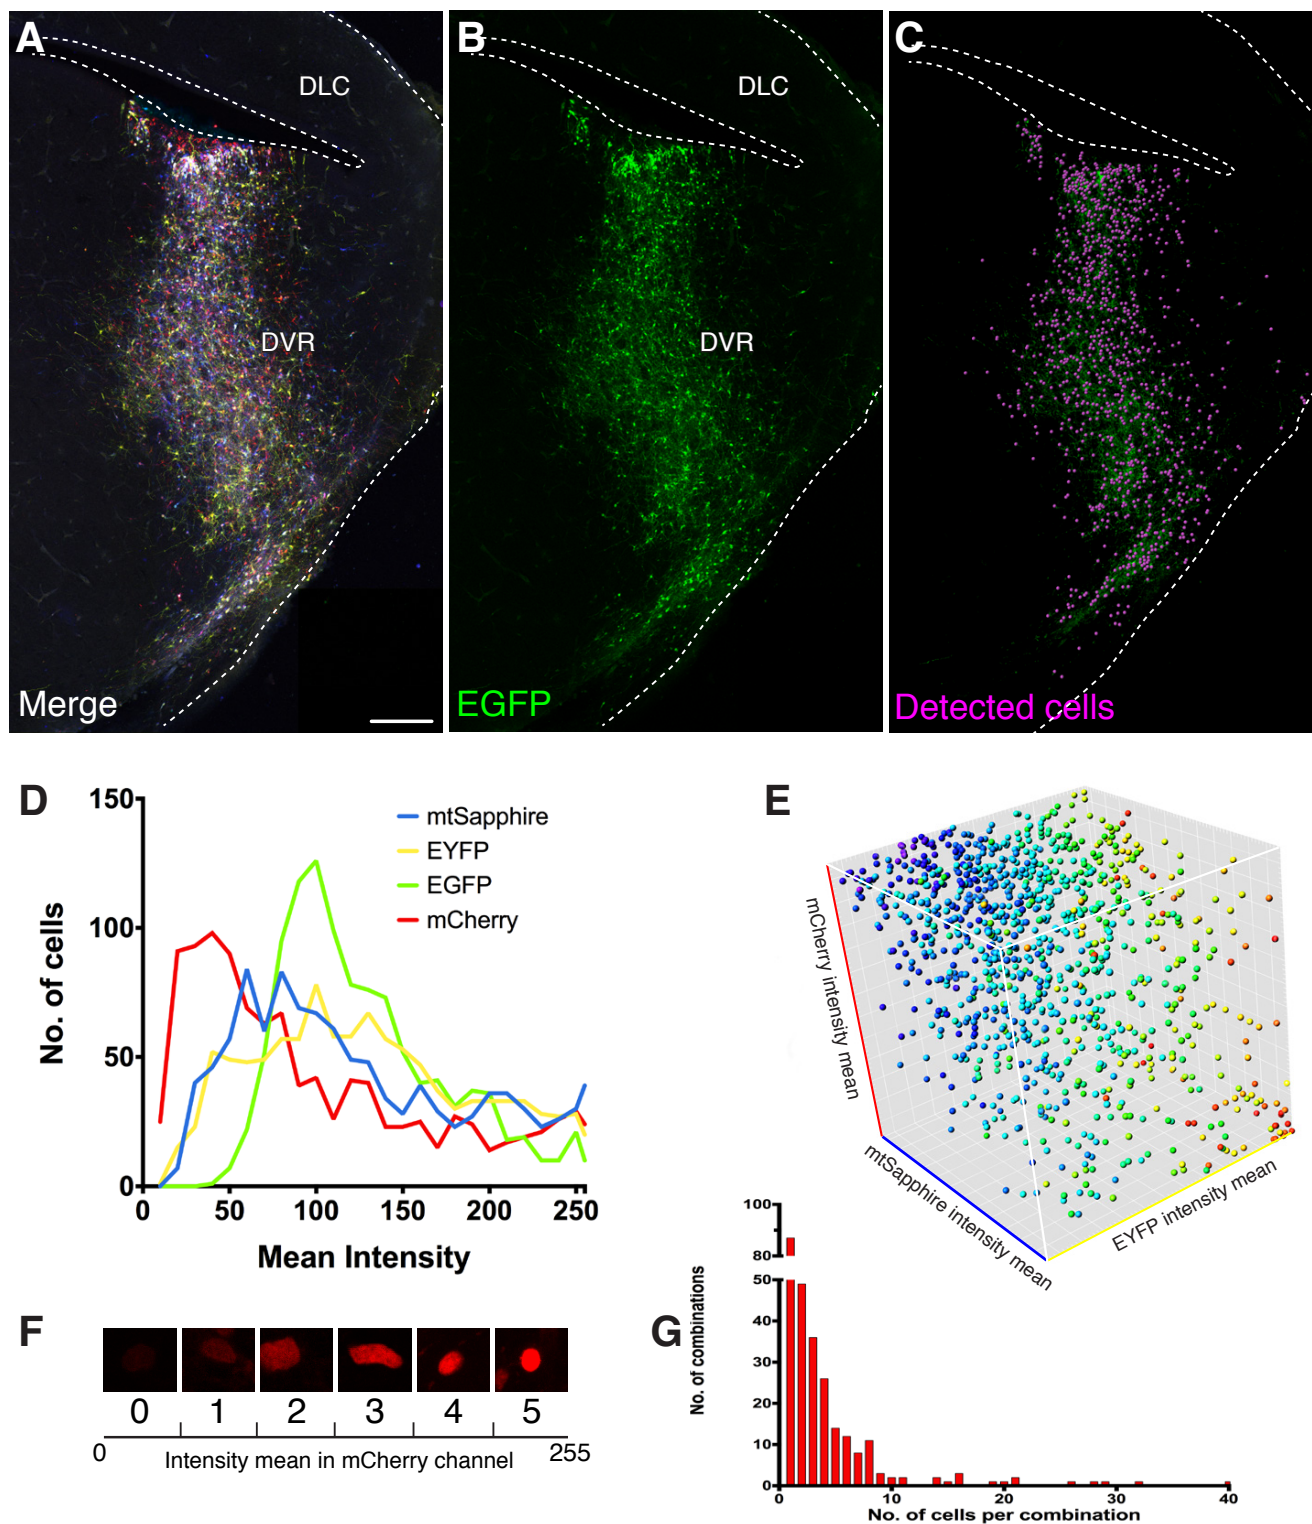

**Figure S4. Discrimination of multiple fluorescent combinations.** (A) Coronal section of a chick forebrain electroporated at E5 with pCAG-CRE enabled *CLoNe* labeling and imaged at E10. (B) EGFP-expressing cells only. (C) Spot detection of cells by IMARIS. 1072 cells were detected and analysed. All data is presented in Supplementary dataset 1. (D) Distribution of mean intensities across the different fluorophores of the EGFP cells. Intensity means were distributed across the entire brightness spectra. EGFP histogram does not represent EGFP signal below the threshold employed for the spot detection. (E) Distribution of mean intensities of EGFP-expressing cells. The graph shows no preference for any given combination of colors evidencing the independence of the expression of the different fluorophores. (F) Examples of nc-mCherry brightness for each of the thresholded levels. (G) Number of detected combinations represented in a given number of cells. A maximum of 86 independent combinations were represented in a single cell. The number of combinations represented in a given number cells decayed as the number of cells increased. Scale bars 200  $\mu$ m (A, B).



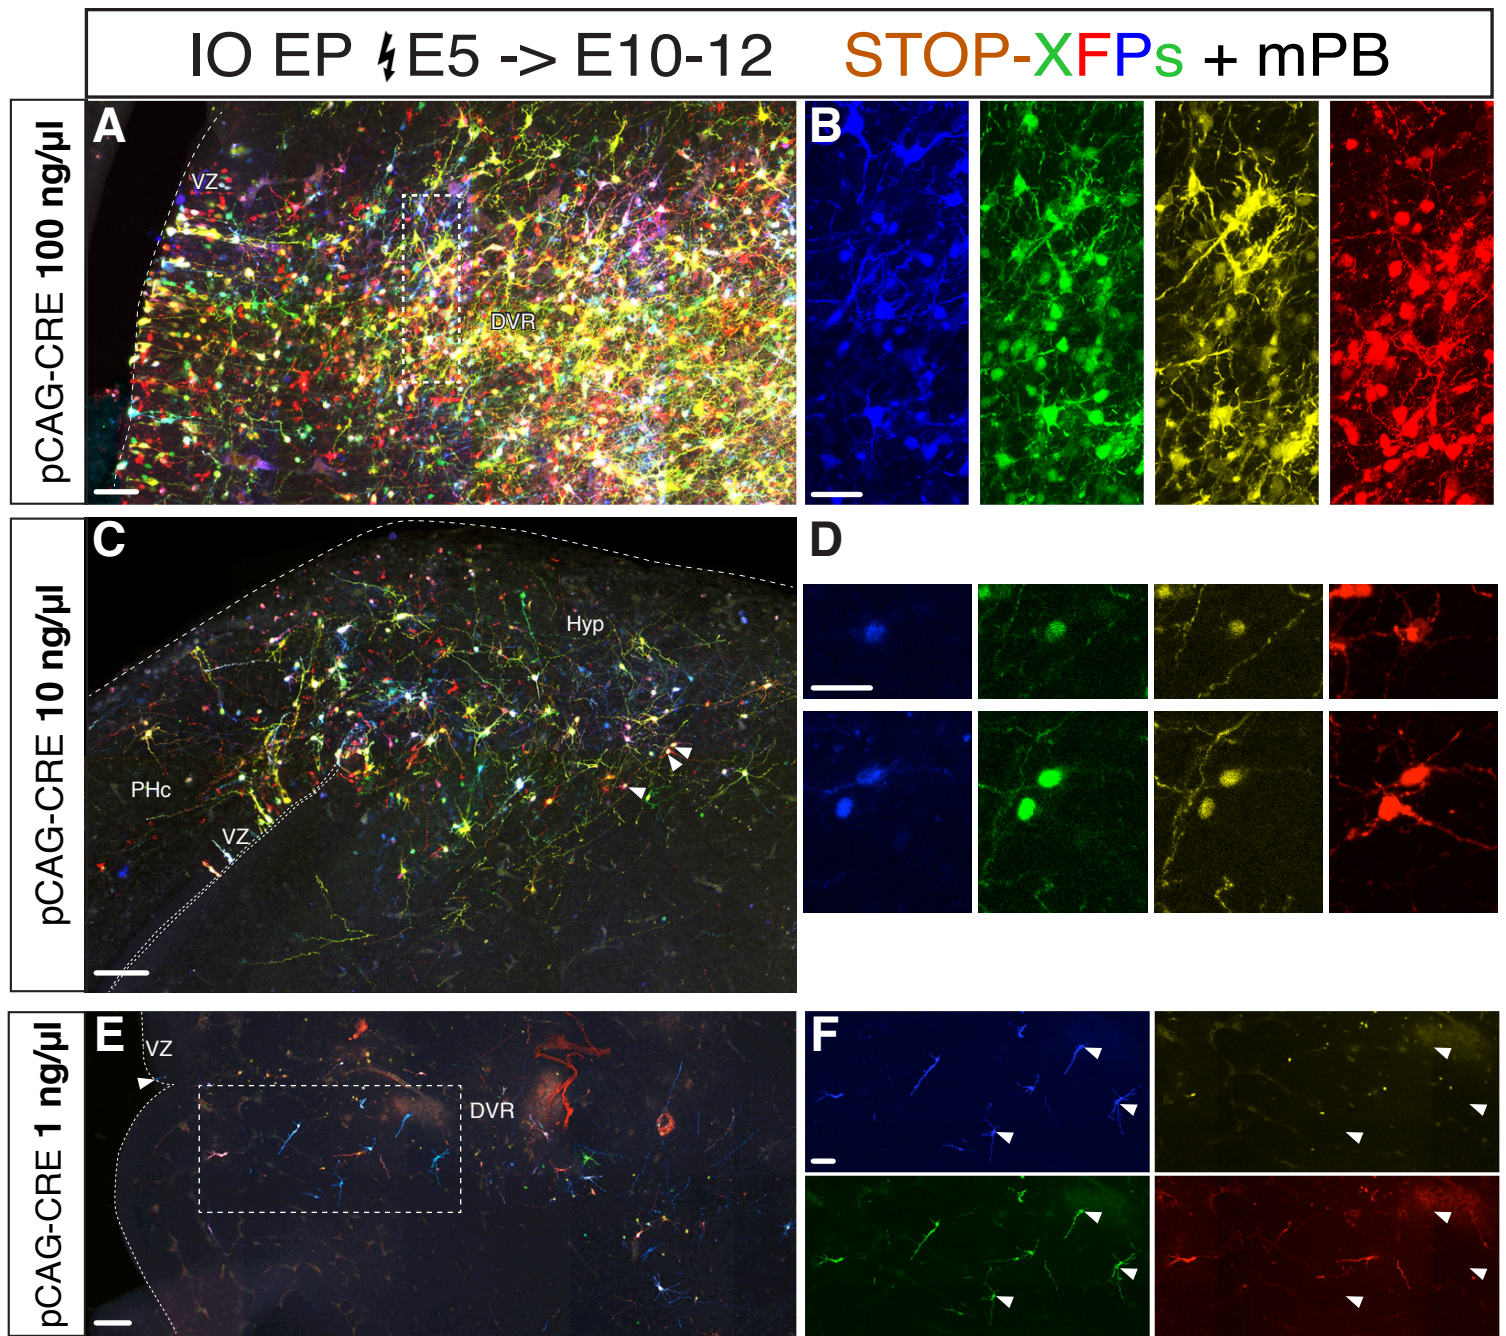

**Figure S5. Dilution of targeting vector scatters progenitor labelling.** Examples of chick forebrains electroporated with *CLoNe* vectors triggered by decreasing concentrations of pCAG-CRE. Brains were transfected at E5 and collected at E10 or E12. (A) pCAG-CRE at 100 ng/μl labelled a vast number of progenitors. (B) Magnification from rectangle in A. Clonal analysis is difficult some progenitors could acquire the same random combinatorial hue. (C) Most efficient labelling was performed at 10 ng/μl, an optimal number of cells was stained and shared combinations can be found. (D) examples of three cells expressing the same palette of colors. (E) At 1 ng/μl, pCAG-CRE labels very few progenitors. (F) Magnification from rectangle in E. Clonal relationships can be described among labelled cells but the cells greatly scattered made the imaging difficult and time-consuming. In addition, the decrease in number of progenitors labelled also affected the number of useful complex combinations. Scale bars 100 μm (A, C, E) and 20 μm (B, D, F).



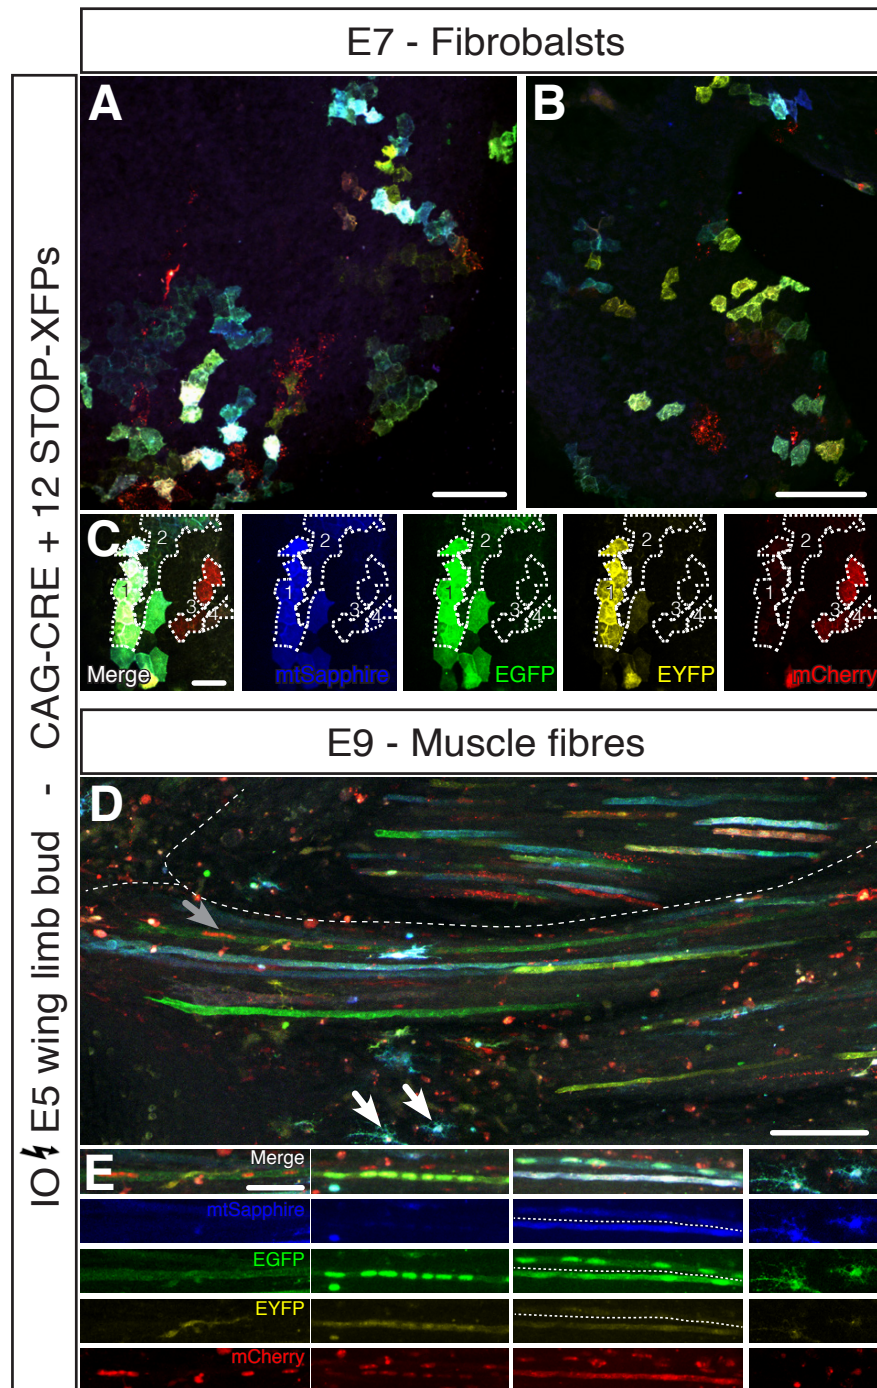

**Figure S6. *CLoNe* reveals fibroblast and myocyte lineage.** Chick E5 embryos were electroporated at wing limb bud with *CLoNe* vectors triggered by pCAG-CRE. Tissue was processed at either E7 (A-C) or E9 (D-E). (A-C) Clonal labelling at wing fibroblasts. Several small groups or pairs of fibroblasts display the same combination of fluorophores. (C) Magnification of a group of four clones comprising a total of 28 fibroblasts depicted by dashed white lines. (D-E) Clonal labelling with membrane fluorophores at wing muscle cells to reveal the arrangements of the clonally related myocytes. (D) Individual myoblasts were labelled and the clonally related myocytes followed as they line up and fuse into multi-nucleated fibers called myotubes. *CLoNe* labelling revealed that members of the same clone arrange into myotube to form cellular syncytia. White arrows point to two sibling cells and grey arrow indicates a clonal syncytium, all of them magnified in E. (E) Magnification and separate fluorescence expression in muscle fibres. Nuclei inside a syncytium shared the same combinatorial hue. Scale bars 100  $\mu\text{m}$  (A,B,D) and 50  $\mu\text{m}$  (C,E).



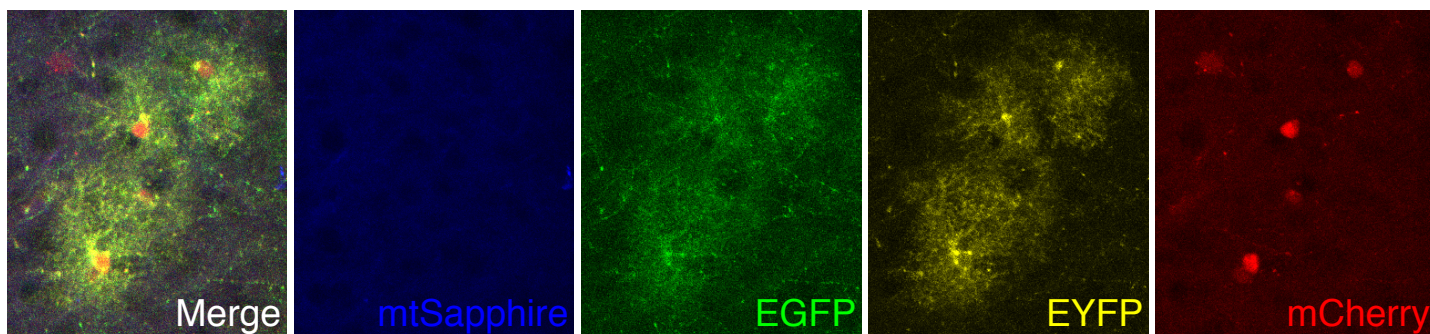

**Figure S7. Conserved pattern of nuclear and membrane fluorescence in clonally related astrocytes.** Expression of the four different fluorophores by the clone of astrocytes 2 from Fig. 5. Membrane (green and yellow) and nuclear labelling (red) are uniform amongst the 4 clonally related cells. Scale bar 25  $\mu\text{m}$ .

**Figure S8 – Multifluorescence neuronal labelling of targeted progenitors.** Mouse

and chick embryos were labelled at different timepoints through selective *CLoNe*. (A-B) Coronal sections of the cerebral cortices of *Tbr2<sup>CRE</sup>* mice electroporated at E12 or E15 and analysed at P0 or P8 respectively. Early electroporations labelled all cortical layers whereas transfection at mid-neurogenesis only labelled the upper cortical layers. (See N.A.V., F.G.-M., Siddharth Arora, Amanda F. P Cheung, Sebastian J. Arnold, Elizabeth J. Robertson and Z.M., unpublished) (C-E)

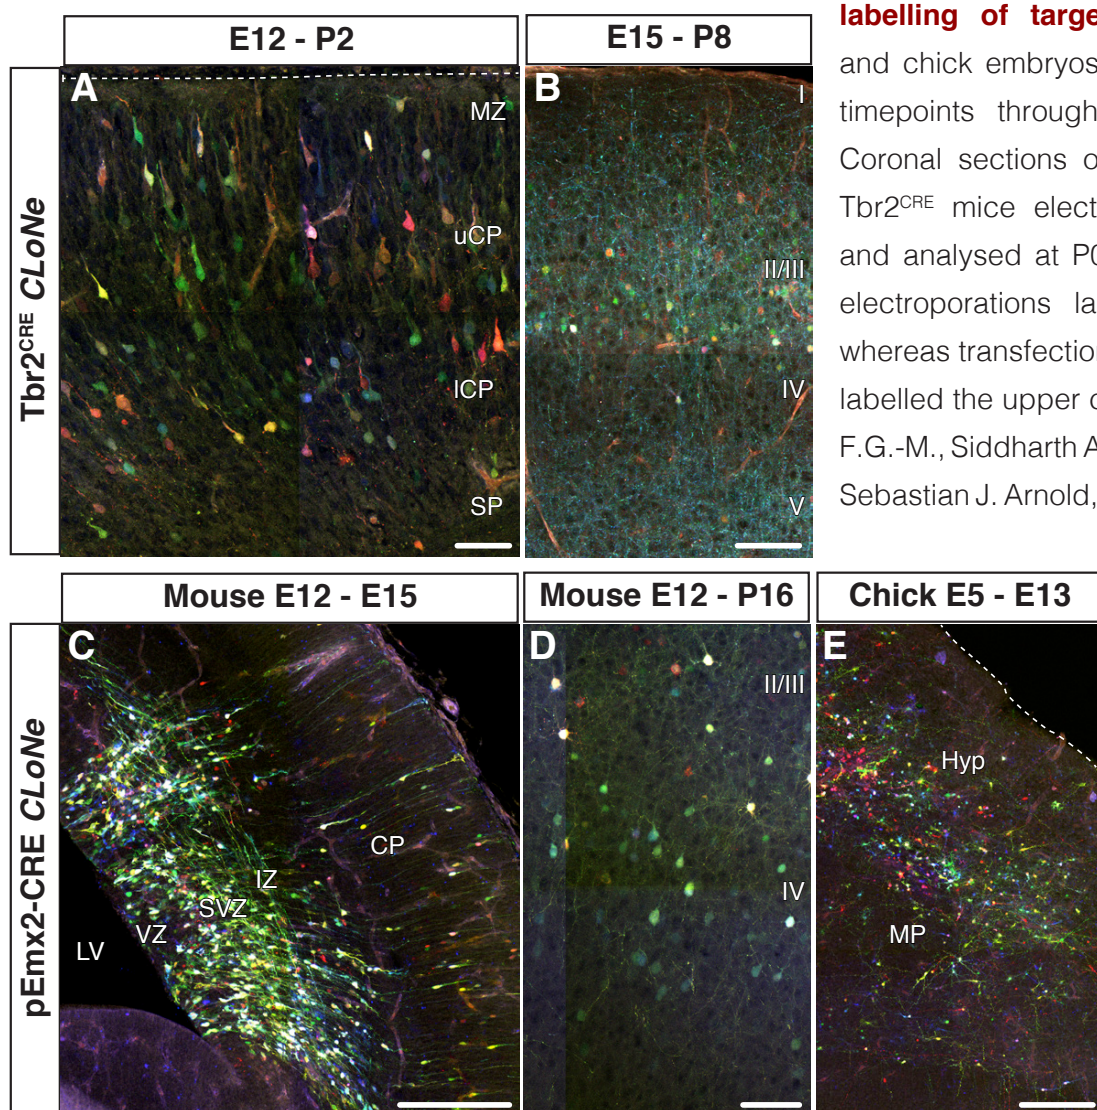

Coronal sections showing multifluorescent labelled neurons by pEmx2-CRE driven *CLoNe* in mouse (C-D) and chick (E). Mouse were electroporated at E12 and analysed at either E15 (C) or P16 (D) and chick electroporations were performed at E5 and studied at E13. Scale bars 200  $\mu\text{m}$  (C,E), 100  $\mu\text{m}$  (B,D) and 50  $\mu\text{m}$  (A).



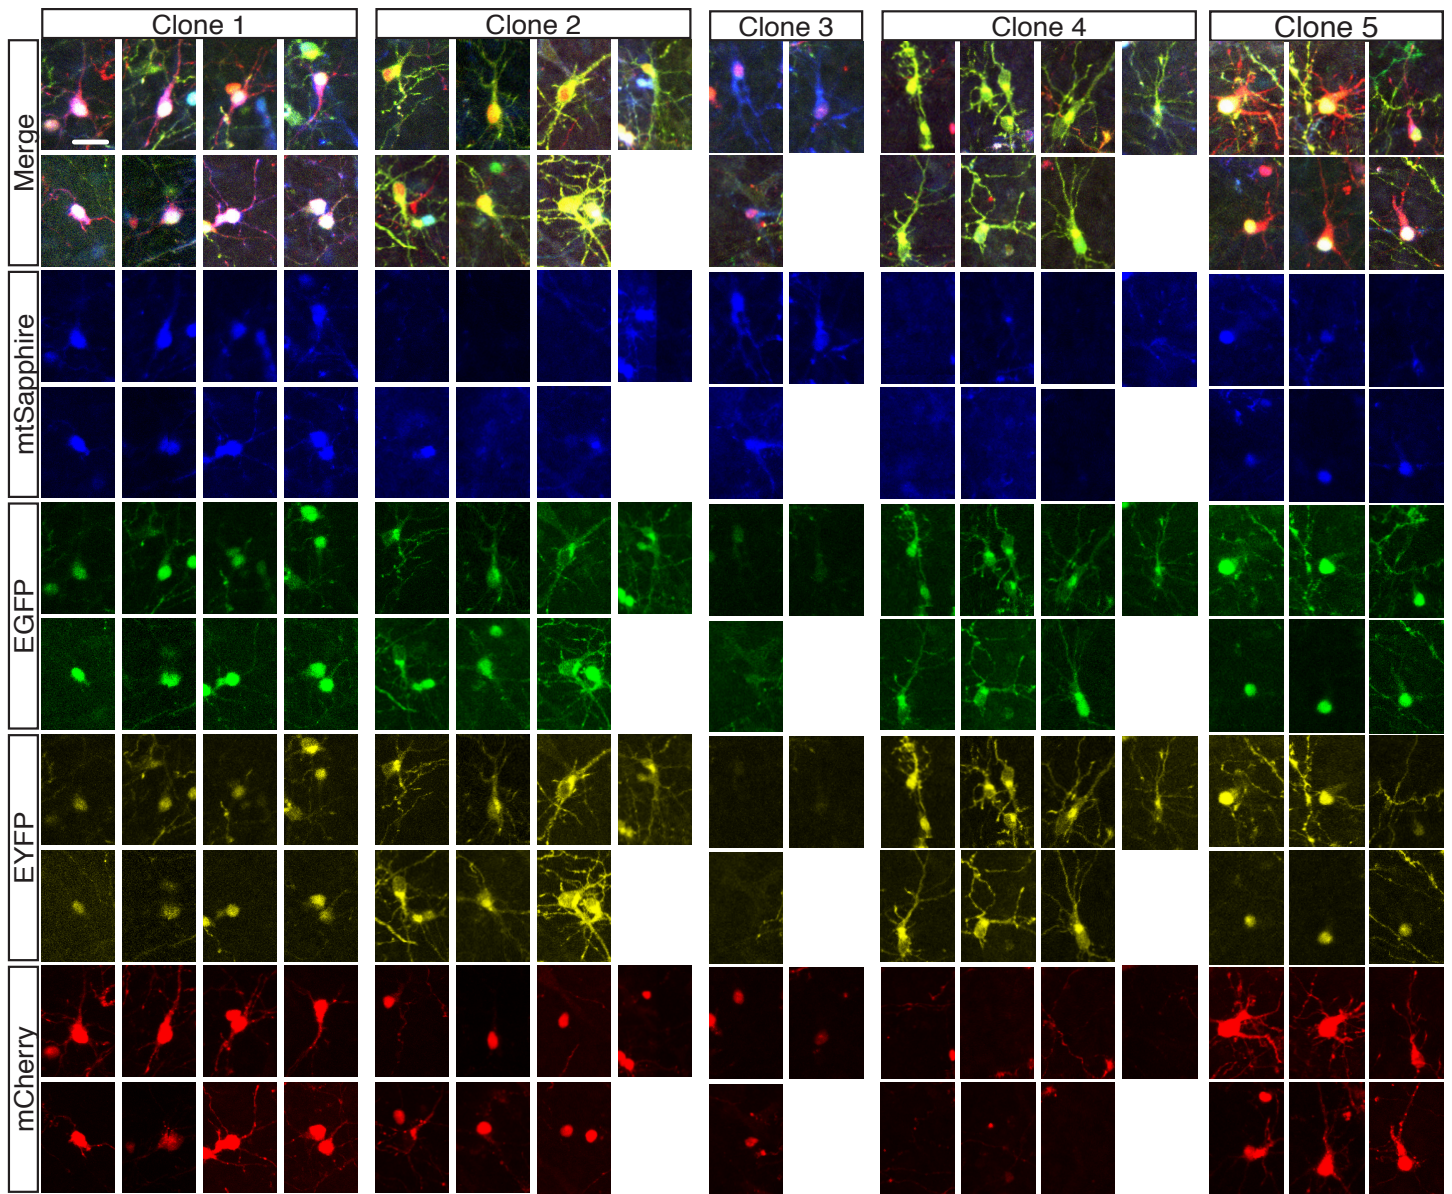

**Figure S9. Fluorescence analysis of chick neuronal clones.** The expression of each of the fluoroproteins was analyzed in the neurons of the clones 1 to 5 from Fig. 6. Notice the conservation of the fluorescent pattern in membrane, nucleus and cytoplasm across all the members of a given clone. Scale bar 25  $\mu$ m.

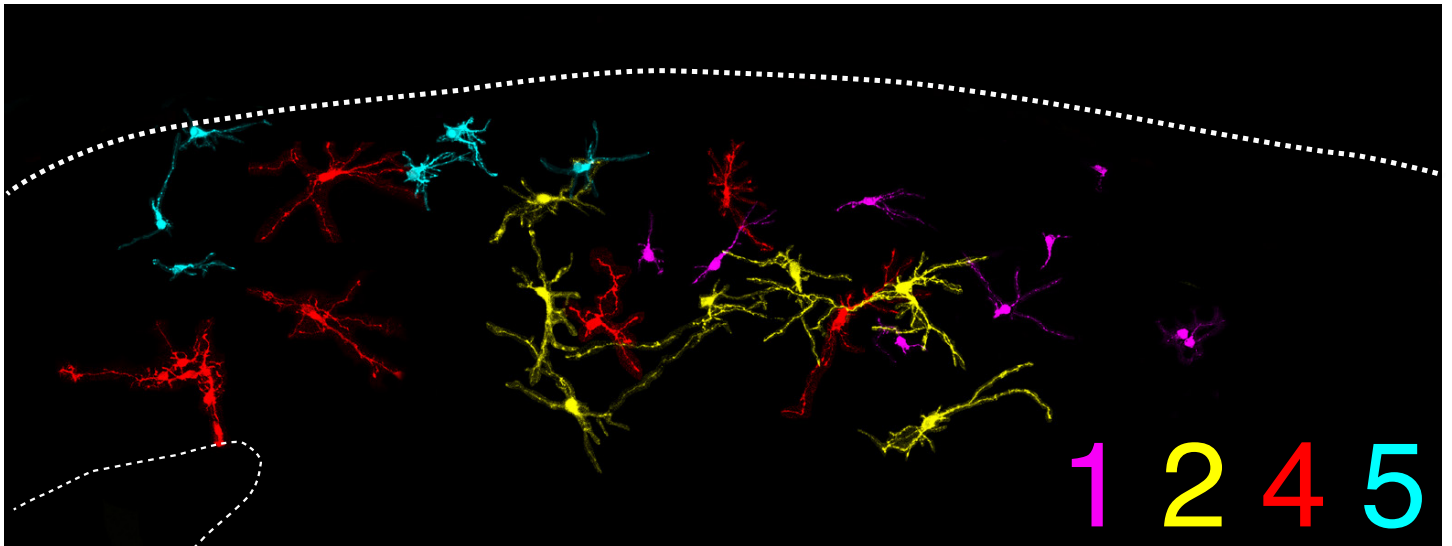

**Figure S10. Distribution of 4 clones in the hyperpallium of chick labelled by *CLoNe*.** Clones were isolated from original images, collapsed in a single section and pseudo-coloured to enhance distinction of clones.

**Table S1. List of fluorophores and their light properties**

|           | <b>Protein</b>    | Absorption maximum (nm) | Laser (nm) | Emission maximum (nm) | Wavelength employed (nm) | Relative Brightness (% of EGFP) | Observations                                                                    |
|-----------|-------------------|-------------------------|------------|-----------------------|--------------------------|---------------------------------|---------------------------------------------------------------------------------|
| Employed  | <b>mtSapphire</b> | 399                     | 405        | 511                   | 470-545                  | 79                              | Large stoke shift. Bright, useful blue fluorophore                              |
|           | <b>EGFP</b>       | 484                     | 488        | 507                   | 490-530                  | 100                             | Bright and independent, no aggregation in cell detected                         |
|           | <b>EYFP</b>       | 514                     | 514        | 527                   | 515-580                  | 151                             | Bright and independent, slight overlap to EGFP, no aggregation in cell detected |
|           | <b>mCherry</b>    | 587                     | 561        | 610                   | 580-695                  | 47                              | Bright and independent, no aggregation in cell detected                         |
| Discarded | <b>mTFP1</b>      | 462                     | 458        | 492                   |                          | 162                             | Very bright, overlaps with mtSapphire and EGFP                                  |
|           | <b>mKeima</b>     | 440                     | 458        | 620                   |                          | 10                              | Fluorescence not bright enough to be comparable to the other fluorophores       |
|           | <b>mCerulean</b>  | 433                     | 458        | 475                   |                          | 79                              | Fluorescence not bright enough to be comparable to the other fluorophores       |
|           | <b>mKO</b>        | 548                     | 561        | 559                   |                          | 92                              | Bright, overlaps with mCherry                                                   |

The list describes the features of the eight fluoroproteins tested. Accordingly, only four of them were employed in CLoNe. Part of the information was extracted from <http://www.olympusconfocal.com/applications/fpcolorpalette.html>.
